# Supplementary material for: Boosting the interface reaction activity and kinetics of cobalt molybdate by phosphating treatment for aqueous zinc-ion batteries with high energy density and long cycle life
Source: Royal Society of Chemistry journal article supplement (doi:10.1039/d0ta07746a), 2020-01-01
Supplement: d0ta07746a1.pdf [file d0ta07746a1.pdf]

## Supporting Information

### **Boosting interface reaction activity and kinetics of cobalt molybdate by phosphating treatment for aqueous zinc-ion batteries with high energy density and long cycle life**

Yuenian Shen<sup>1</sup>, Zhihao Li<sup>1</sup>, Zhe Cui<sup>1</sup>, Ke Zhang<sup>3</sup>, Rujia Zou<sup>1</sup>, Fang Yang<sup>3\*</sup>, and Kaibing Xu<sup>1, 2\*a</sup>

<sup>1</sup> State Key Laboratory for Modification of Chemical Fibers and Polymer Materials, College of Materials Science and Engineering, Donghua University, Shanghai, 201620, China

<sup>2</sup> Research Center for Analysis and Measurement, Donghua University, Shanghai, 201620, China

<sup>3</sup> College of Mechanical and Automotive Engineering, Shanghai University of Engineering Science, Shanghai, 201620, China

E-mail: yfang@sues.edu.cn (F. Yang), xukaibing@dhu.edu.cn (K. Xu)

### Calculation principles:

The specific capacity ( $\text{mA h g}^{-1}$ ) is calculated according to the equation:  $C = i \times \Delta t/m$ , where  $i$  (mA) is the applied discharging current,  $\Delta t$  (h) is the discharging time, and  $m$  (g) is the mass loading of active material. The energy density ( $\text{W h kg}^{-1}$ ) and power

density ( $\text{W kg}^{-1}$ ) are estimated based on the formulas:  $E = \int_0^{\Delta t} \frac{V \times i}{m} dt$  and  $P = E/t$ , where  $V$  (V),  $i$  (mA),  $\Delta t$  (h) and  $m$  (g) represent the working voltage, discharging current, discharging time of the assembled batteries, and mass loading of active material on the cathode, respectively.

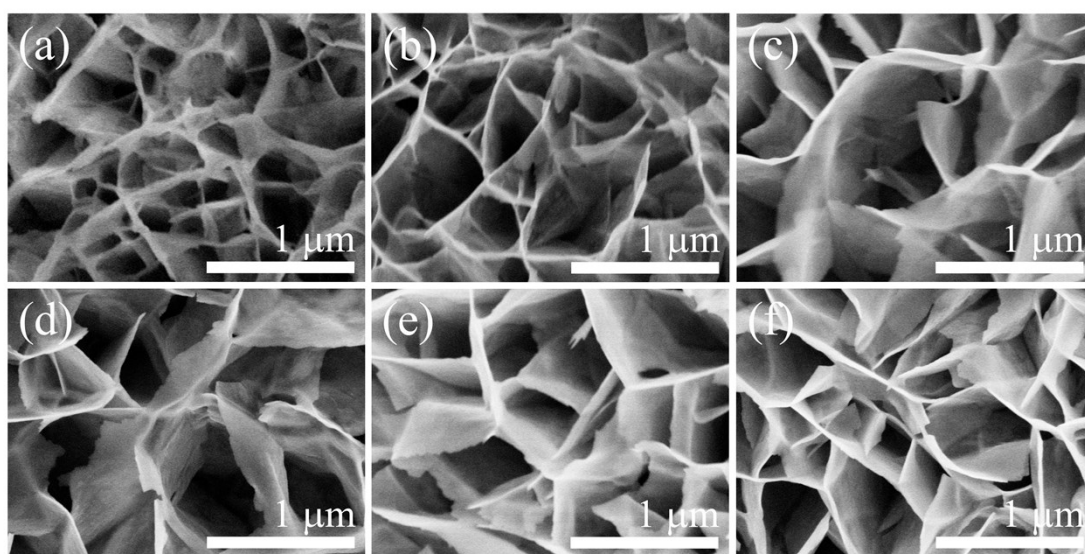

**Fig. S1** SEM images of  $\text{CoMoO}_4$  samples after phosphating treatment at (a) 300 °C, (b) 350 °C and (c) 450 °C for 2h. SEM images of  $\text{CoMoO}_4$  samples after phosphating treatment at 400 °C for (d) 0.5 h, (e) 1 h and (f) 5 h.

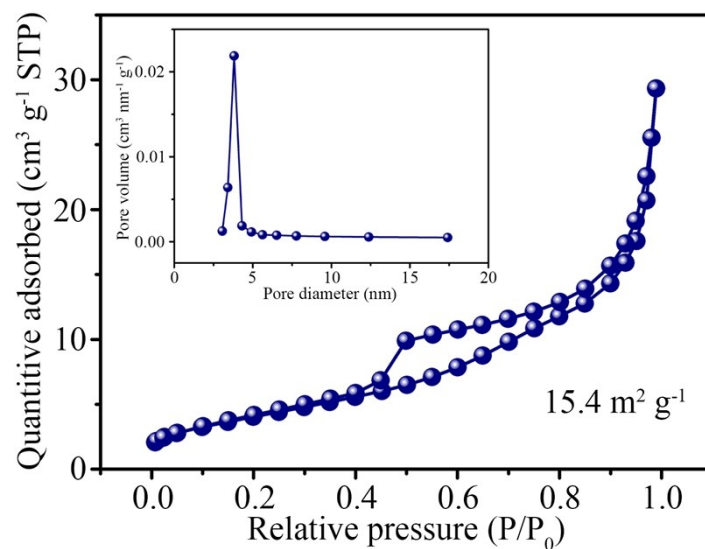

**Fig. S2** N<sub>2</sub> adsorption/desorption isotherm and pore-size distribution curve (inset) of CoMoO<sub>4</sub> sample.

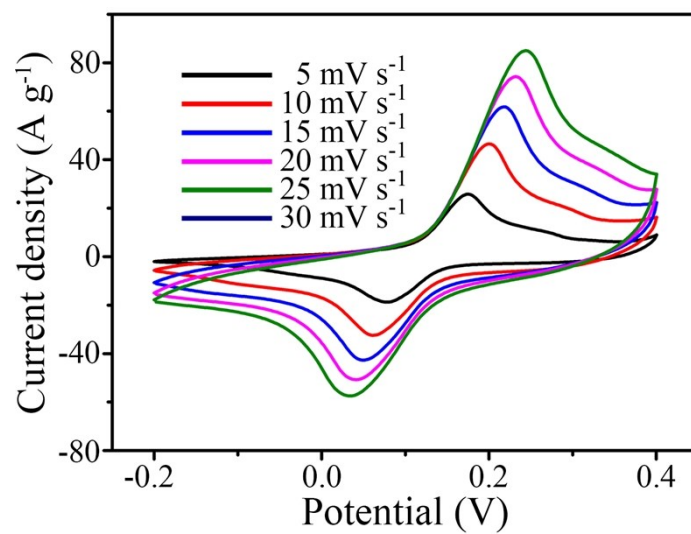

**Fig. S3** CV curves of CoMoO<sub>4</sub> electrode at different scan rates.

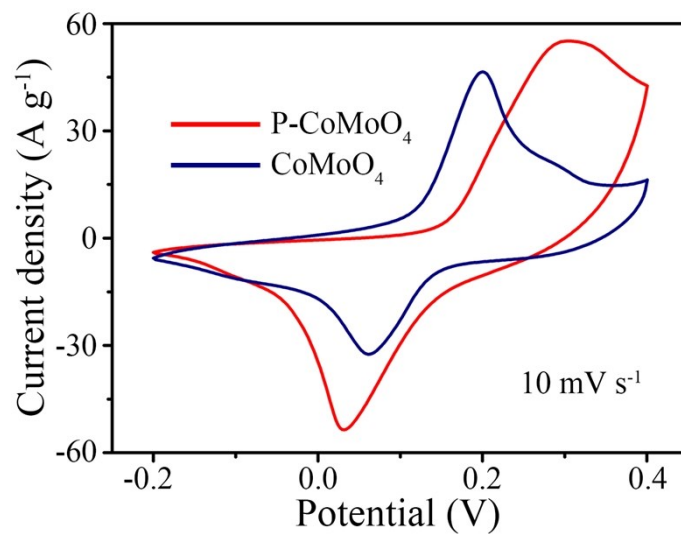

**Fig. S4** The comparison of CV curves for  $\text{CoMoO}_4$  and  $\text{P-CoMoO}_4$  electrodes at  $10 \text{ mV s}^{-1}$ .

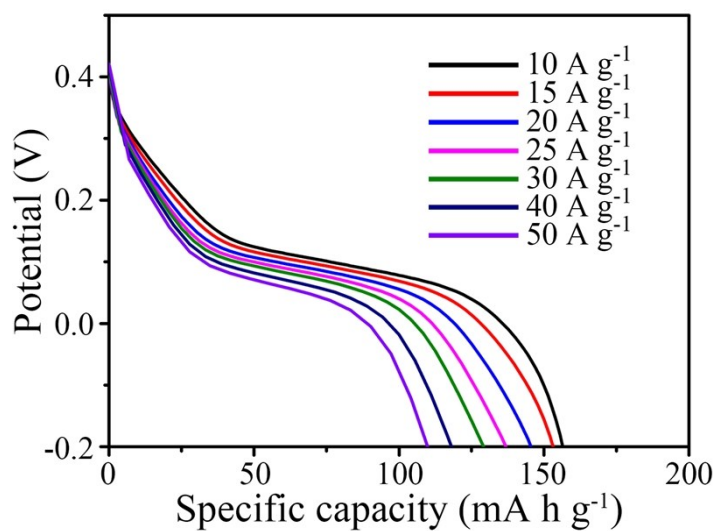

**Fig. S5** Discharge curves of  $\text{CoMoO}_4$  electrode at different current densities.

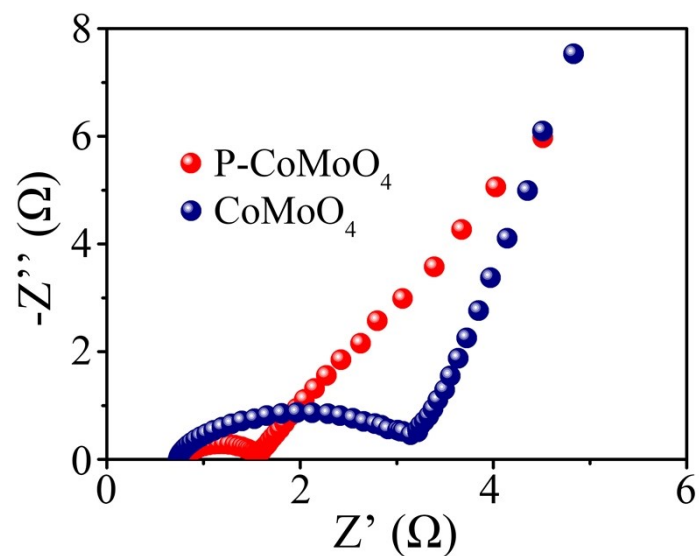

**Fig. S6** Nyquist plots of  $\text{CoMoO}_4$  and  $\text{P-CoMoO}_4$  electrodes.

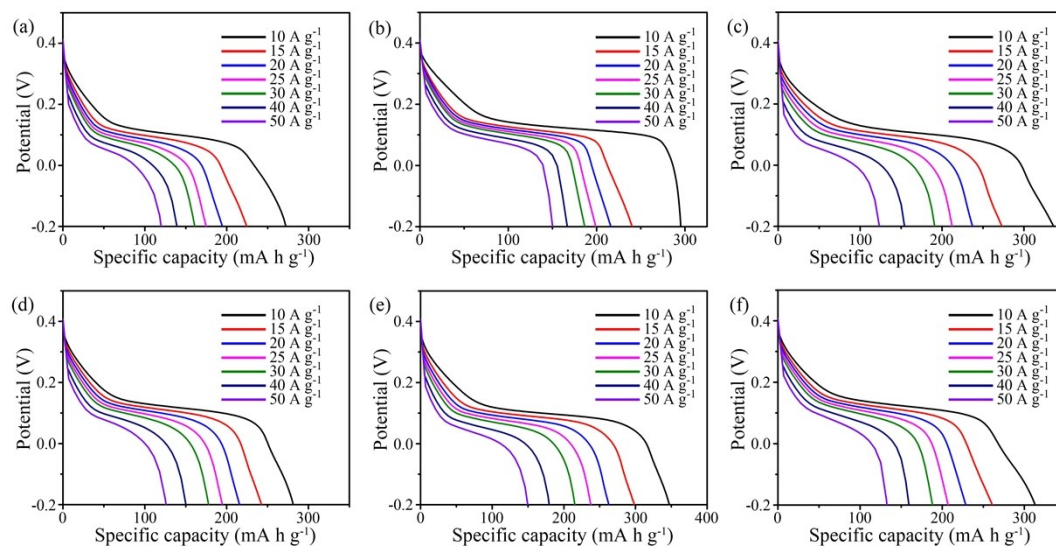

**Fig. S7** Discharge curves of  $\text{CoMoO}_4$  electrodes after phosphating treatment at (a) 300 °C, (b) 350 °C and (c) 450 °C for 2h. Discharge curves of  $\text{CoMoO}_4$  electrodes after phosphating treatment at 400 °C for (d) 0.5 h, (e) 1 h and (f) 5 h.

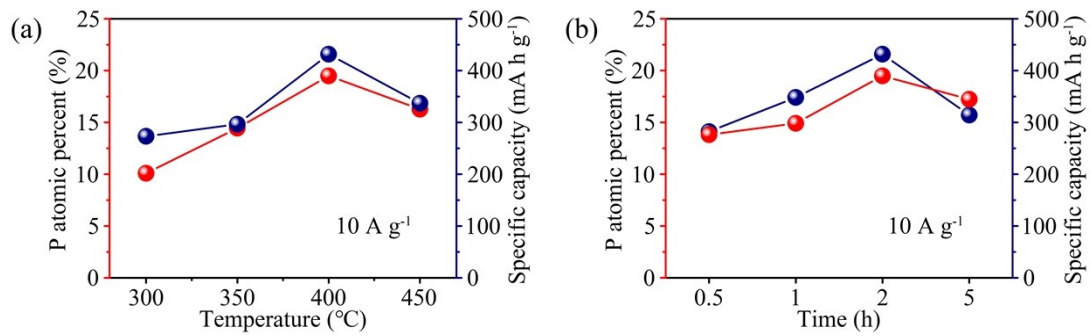

**Fig. S8** Relationship of specific capacity versus P atomic percent after phosphating treatment (a) at different temperature for 2h, and (b) at 400 °C for different holding time.

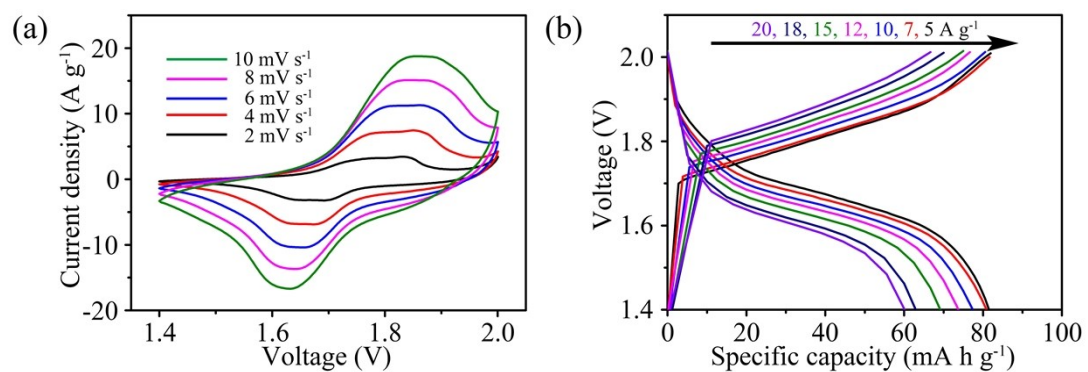

**Fig. S9** (a) CV curves of CoMoO<sub>4</sub>//Zn battery at different scan rates. (b) GCD curves of CoMoO<sub>4</sub>//Zn battery at different current densities.

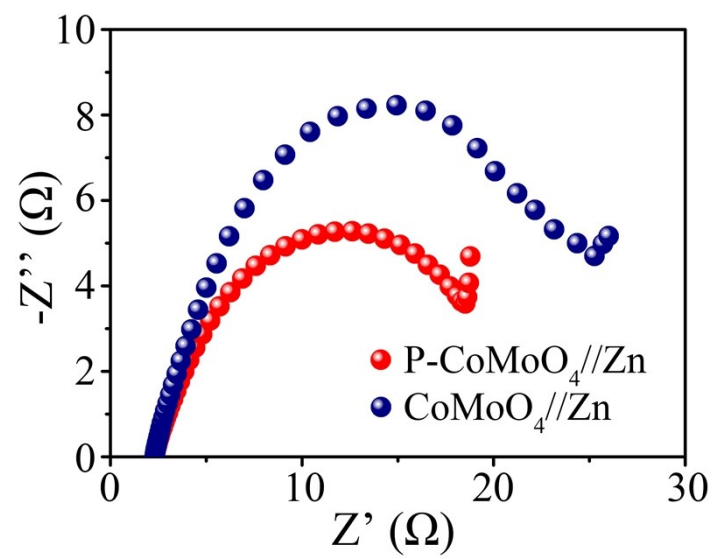

**Fig. S10** Nyquist plots of CoMoO<sub>4</sub>//Zn and P-CoMoO<sub>4</sub>//Zn batteries.
